# Supplementary material
Source: ML conference proceedings conference paper supplement (https://proceedings.neurips.cc/paper_files/paper/2018/hash/c6969ae30d99f73951cb976b88a457af-Abstract.html)
Supplement: Supplementary file [file c6969ae30d99f73951cb976b88a457af-Supplemental.zip]

---

# Context-Aware Synthesis and Placement of Object Instances

## Supplementary Material

---

Donghoon Lee<sup>1,2,\*</sup>, Sifei Liu<sup>3</sup>, Jinwei Gu<sup>3</sup>, Ming-Yu Liu<sup>3</sup>,  
Ming-Hsuan Yang<sup>2,4</sup>, Jan Kautz<sup>3</sup>  
donghoon.lee@rllab.snu.ac.kr {sifeil, jinweig, mingyul}@nvidia.com  
mhyang@ucmerced.edu jkautz@nvidia.com  
<sup>1</sup>Seoul National University  
<sup>2</sup>Google Cloud AI  
<sup>3</sup>NVIDIA  
<sup>4</sup>University of California at Merced

In this supplementary material, we describe additional experimental results.

**GIF files.** In addition to the pdf document, we provide six gif files in the supplementary material. File one to four show training progress of the *where* network from epoch 0 to 30. It shows learned spatial distributions of inserting persons (shown as red) and cars (shown as blue). The distributions are shown as the heatmaps, by sampling input random vectors  $z_l$  in the *where* module. As the epoch increases, the predicted distribution becomes more diverse and reasonable.

For file five and six, we sample different random vectors  $z_s$  in the *what* module while  $z_l$  is fixed. The results show that the proposed algorithm renders diverse and realistic person shapes at a fixed location, i.e., the effect of  $z_l$  and  $z_s$  are disentangled.

**Manipulated semantic maps.** Figure 1, Figure 2 and Figure 3 show results of the proposed algorithm. For each semantic map, we inserted a single person.

---

\*This work is mainly done when Donghoon Lee was an intern at NVIDIA.

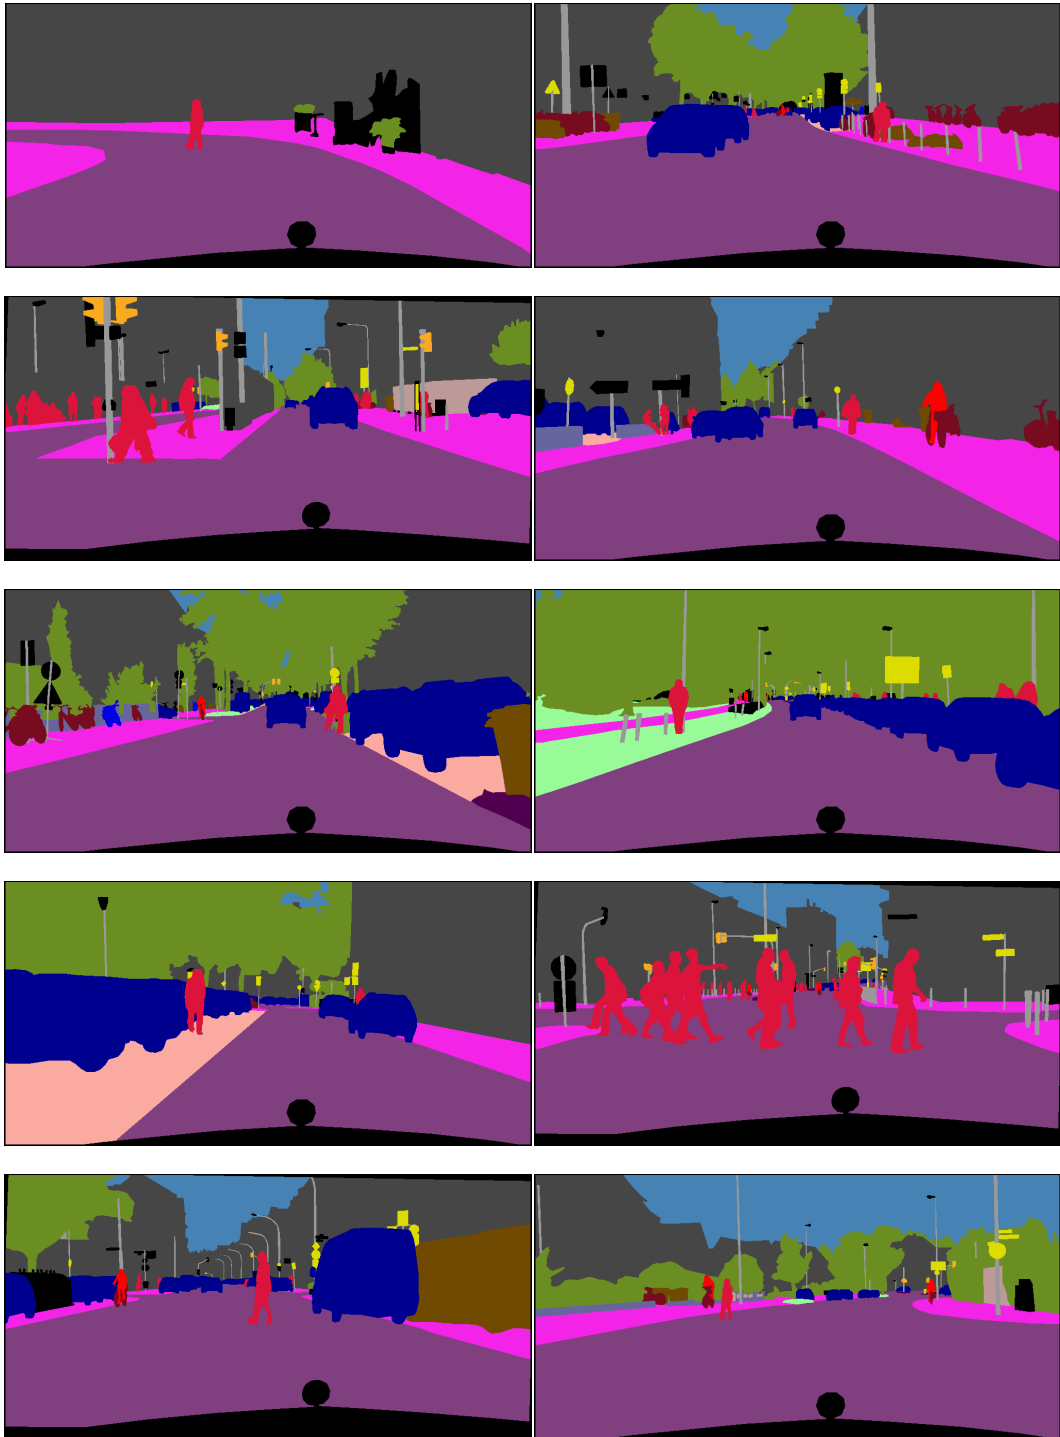

Figure 1: Results of an inserted person in the semantic map.

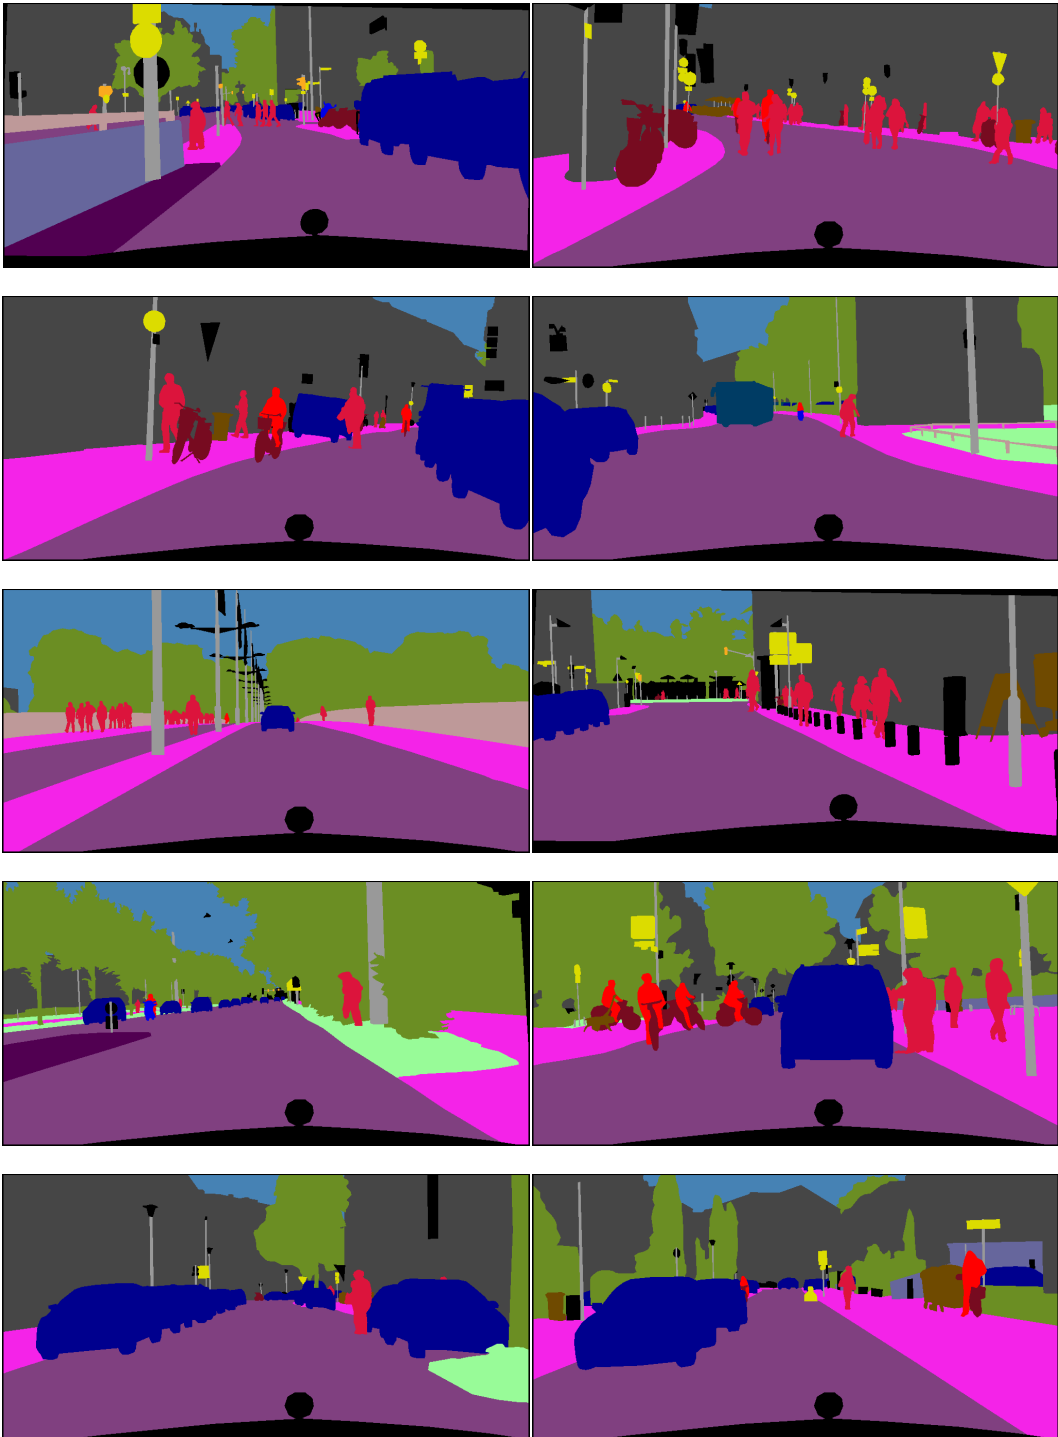

Figure 2: Results of an inserted person in the semantic map.

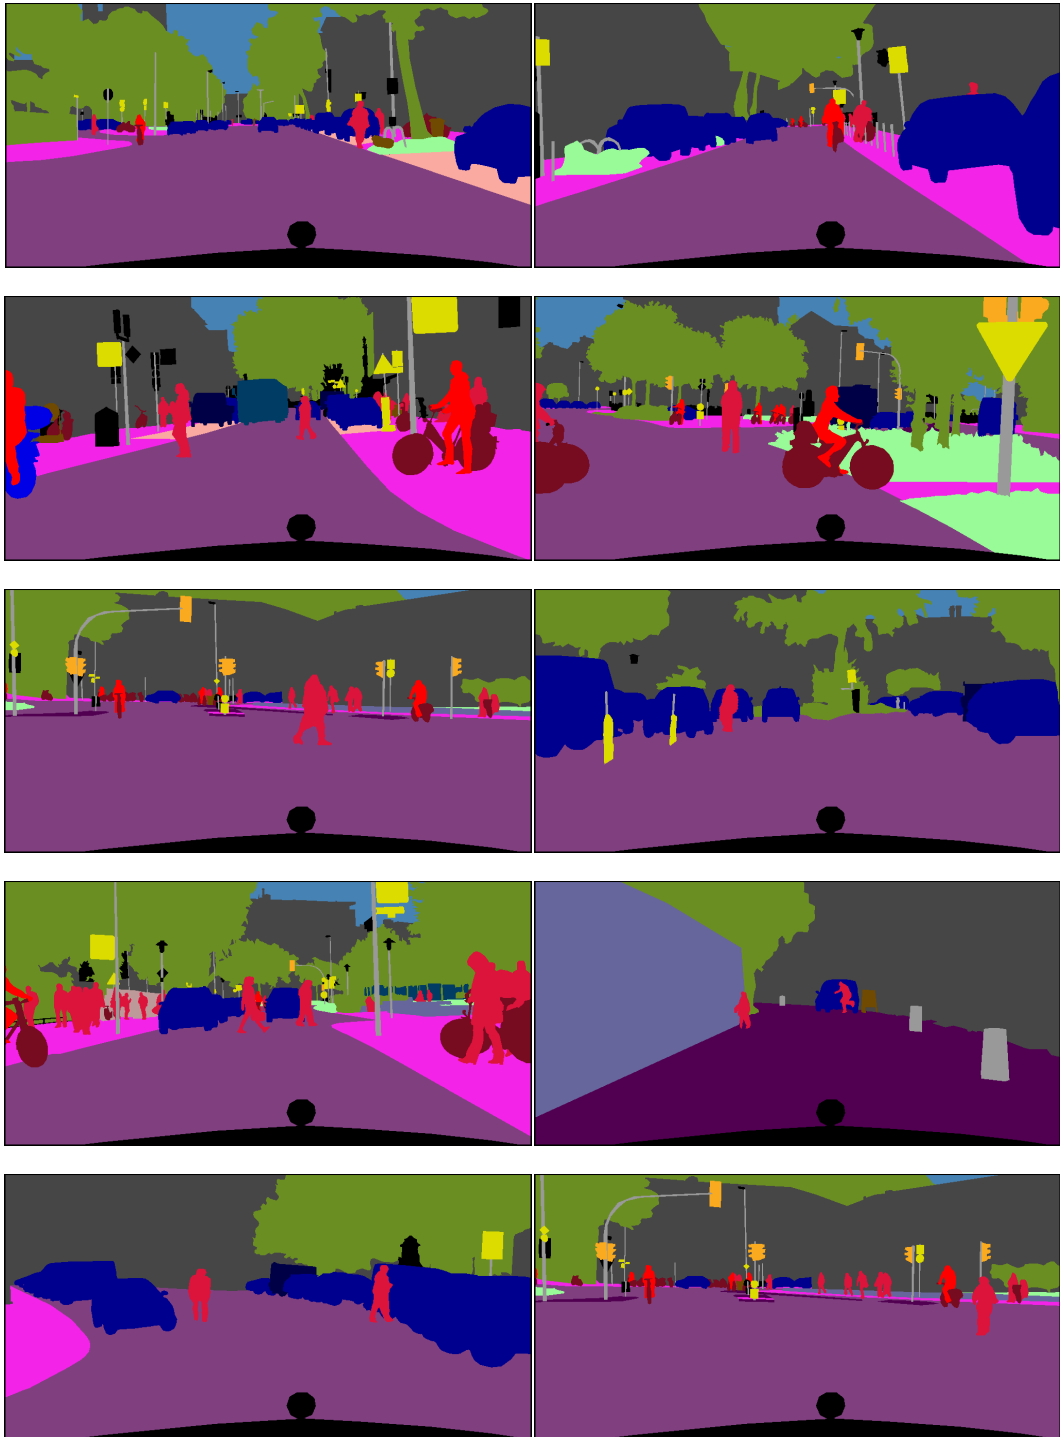

Figure 3: Results of an inserted person in the semantic map.
